# Supplementary material for: Nicotinamide adenine dinucleotide suppresses epileptogenesis at an early stage
Source: PubMed Central journal article supplement (PMC5544671; doi:10.1038/s41598-017-07343-0), 2017-08-04

# **Nicotinamide adenine dinucleotide suppresses epileptogenesis at an early stage**

Juan Liu, MSc,<sup>1,2#</sup> Beimeng Yang, PhD,<sup>1#</sup> Pei Zhou, MSc,<sup>1#</sup> Yingying Kong, MSc,<sup>1</sup> Weiwei Hu, MSc,<sup>1</sup> Geng Zhu, PhD,<sup>1</sup> Weihai Ying, PhD,<sup>3</sup> Weidong Li, PhD,<sup>1\*</sup> Yun Wang, PhD,<sup>2\*</sup> Shengtian Li, PhD,<sup>1\*</sup>

<sup>1</sup> Key laboratory for the Genetics of Developmental and Neuropsychiatric Disorders (Ministry of Education), Bio-X Institutes, Shanghai Key Laboratory of Psychotic Disorders, Institute of Social Cognitive and Behavioral Sciences, and Brain Science and Technology Research Center, Shanghai Jiao Tong University, 800 Dongchuan Road, Shanghai 200240.

<sup>2</sup> Institutes of Brain Science, State Key Laboratory for Medical Neurobiology, Collaborative Innovation Center for Brain Science, Fudan University, Shanghai, 200032.

<sup>3</sup> School of Biomedical Engineering and Med-X Research Institute, Shanghai Jiao Tong University, Shanghai, 200030.

# Co-first authors

\* Co-corresponding authors

Correspondence should be addressed to:

Dr. Shengtian Li, Bio-X Institutes, Shanghai Jiao Tong University, Shanghai, China.

Email: lstian@sjtu.edu.cn;

Dr. YunWang, Collaborative Innovation Center for Brain Science, Fudan University, China.

Email: yunwang@fudan.edu.cn;

Dr. Weidong Li, Bio-X Institutes, Shanghai Jiao Tong University, Shanghai, China.

Email: liwd@sjtu.edu.cn.

Full-length blots for Fig 5d from the main text

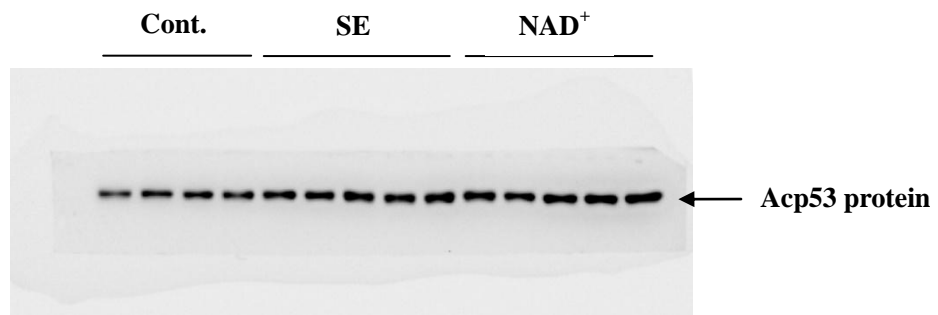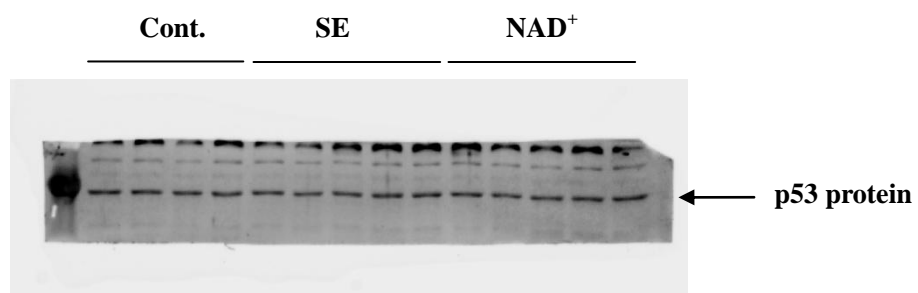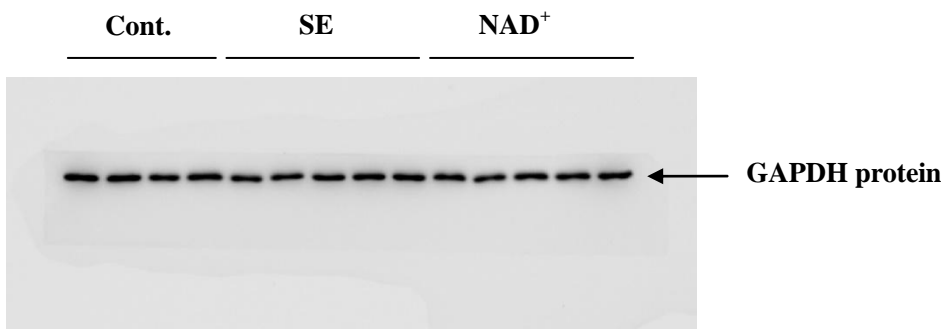

Supplement: 41598_2017_7343_MOESM1_ESM.pdf [file 41598_2017_7343_MOESM1_ESM.pdf]
